# Supplementary material
Source: PubMed Central journal article supplement (PMC153040)

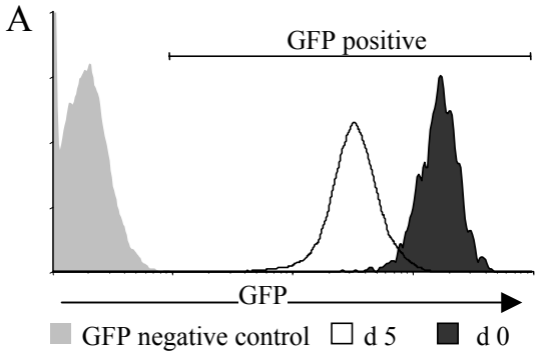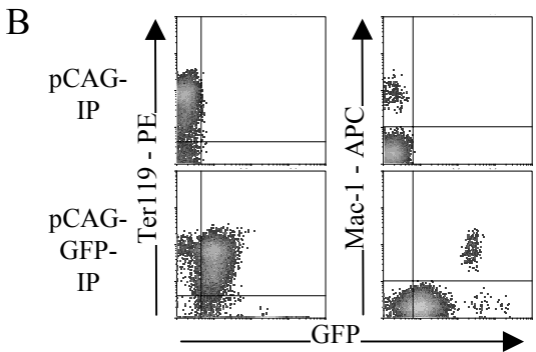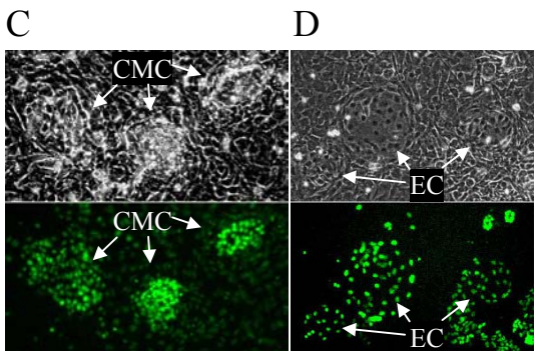

Supplement: pnas_0438008100_2.pdf [file pnas_0438008100_2.pdf]
